# Supplementary material for: In vitro education of human natural killer cells by KIR3DL1
Source: Life Sci Alliance. 2019 Nov 13;2(6):e201900434. doi: 10.26508/lsa.201900434 (PMC6856763; doi:10.26508/lsa.201900434)
Supplement: Supplementary file 2 [file LSA-2019-00434_SdataF3.xlsx]

## Sheet: Sheet1
Fig 3A		Bw4- training																				Bw4+ training
100U/ml	Bw4- Donors	8.14	13.7	16.2	8.13	8.56	15.2	12.1	9.46	14.5	10.5	6.52	10.2	13.5	11	20.7	20.1	11.4				15.2	24.2	14.1	12.5	10.5	18	22.9	14.7	16.2	6.21	4.19	8.07	17.9	17	29	27.9	12.3
	Bw4+ Donors	13.8	7.98	10.6	15	7.28	12.5															15.7	10.7	14.3	14.9	9.47	24.1
Fig 3A		Bw4- training																				Bw4+ training
500U/ml	Bw4- Donors	6.43	16.4	11.9	5.93	6.69	11.6	21.3	9.47	19.6	6.88	7.94	37	19.2	12.1	31.9	20.1	12.4				16.5	27.8	13.4	9.01	12.9	15.5	28.6	8.91	19.4	4.63	8.9	51.9	16.9	19.8	39.6	32.4	15.8
	Bw4+ Donors	20.7	7.9	18.6	26.3	10.1	12.1															31	13	21.8	29.3	10.9	29.6
Fig 3B		Bw4- training																				Bw4+ training
100U/ml	Bw4- Donors	27.6	22.9	36.9	15.2	22.7	25.9	15.5	18.1	33.2	5.42	19.1	30	20	26.4	29	25.2	20.7				23.4	28.1	32	11.8	20.3	25.5	23.5	18.1	31.2	4.29	20.7	32.6	22.9	25.4	33.7	24.6	23
	Bw4+ Donors	14.7	31.6	31.9	20.8	16.6	19.8															17.5	30.2	31.6	25.4	19.2	17.7
Fig 3B		Bw4- training																				Bw4+ training
500U/ml	Bw4- Donors	23.4	28.1	32	11.8	20.3	25.5	23.5	18.1	31.2	4.29	20.7	32.6	22.9	25.4	33.7	24.6	23				31.8	28.9	24	11.2	17.8	20	22.6	17.1	35	4.04	18.5	38.9	16.4	25.6	34.9	25.9	18.8
	Bw4+ Donors	17.5	30.2	31.6	25.4	19.2	17.7															17.9	25.3	17.1	21	13.2	23.1
