# Supplementary material for: In vitro education of human natural killer cells by KIR3DL1
Source: Life Sci Alliance. 2019 Nov 13;2(6):e201900434. doi: 10.26508/lsa.201900434 (PMC6856763; doi:10.26508/lsa.201900434)
Supplement: Supplementary file 3 [file LSA-2019-00434_SdataF4.xlsx]

## Sheet: Sheet1
Fig 4A		Bw4- training																				Bw4+ training
	Bw4- Donors	50.8	53	34.4	57.2	63.6	69.7	66.4	51.1	19.2	69.3	71.2	58.7	70.8	56.2	65.5	58.6	69.3				53.3	62.4	26	58.9	65.2	59.1	72.3	54.9	40	79.4	75.2	65.4	66.3	63.3	65.5	58.4	68.8
	Bw4+ Donors	71.6	26.3	55.6	58.3	80	71.2															70.4	25.3	66.9	75.2	79.9	74.4
Fig 4B		Bw4- training																				Bw4+ training
	Bw4- Donors	14	24.7	14.8	21.6	27.9	33.6	9.8	13.6	3.81	15.3	31.3	15.4	19	17.8	12.8	10.5	12				25.5	28.3	10.5	16.3	28.7	32.3	13.3	24	13.5	25.9	37.7	13.2	27.7	28.4	20.5	6.06	12.3
	Bw4+ Donors	9.97	15.7	20.8	12.9	33.1	11.3															18.8	11.7	20	22.3	29.3	21.3
Fig 4C		Bw4- training																				Bw4+ training
	Bw4- Donors	10.3	19.7	7.91	21.6	23.1	33.3	10.9	9.48	1.9	16.1	29.7	11.9	21.5	16.2	16.7	12.5	12.3				22.2	27.5	8.48	18.7	27.1	26.5	16.9	18.5	14.9	25.7	37.4	14.6	31.4	25.9	22.7	5.01	15.2
	Bw4+ Donors	11.5	7.49	19.4	13.3	32.3	13															19.5	9.09	25	19.9	31.1	16
Fig 4D		Bw4- training																				Bw4+ training
	Bw4- Donors	0.403922	0.740602	0.328216	0.507042	0.68546	0.858247	0.731544	1.04405	0.260631	0.67364	0.671946	0.566667	0.793358	1	0.932961	0.862069	0.754601				0.678899	1.05364	0.390783	0.623333	0.6775	0.800604	0.923497	1.36029	1.1037	1.09829	0.782427	0.820225	1.10563	1.40761	1.07583	0.31118	1.02013
	Bw4+ Donors	0.727848	0.527465	0.877828	0.943262	1.07309	0.653266															1.16766	0.505	0.825083	0.995	1.00647	1.00629
Fig 4F		Bw4- training																	Bw4+ training
	Bw4- Donors	2.7	0	2.56	0.777	5.79	20.8	10.8	8.33										4.08	14.3	5.48	3.95	3.66	30.8	10.1	33
	Bw4+ Donors	3.33	13.8	23.1	15.7	9.46	5.7	6.79	15.3	16.6	5.42	5.1	10.3	5.51	5.83	9.33			0	10.1	6.2	7.14	10.4	4.49	6.15	5.48	7.6	3	8.01	12.3	7.91	3.78	7.82
