# Supplementary material for: In vitro education of human natural killer cells by KIR3DL1
Source: Life Sci Alliance. 2019 Nov 13;2(6):e201900434. doi: 10.26508/lsa.201900434 (PMC6856763; doi:10.26508/lsa.201900434)
Supplement: Supplementary file 5 [file LSA-2019-00434_SdataF6.xlsx]

## Sheet: Sheet1
Fig 6A		Bw4- BCL															Bw4+ BCL															Bw4+ BCL 2nd test
	Bw4- donors	9.35	18.1	6.17	6.56	7.87	5.28	7.61	5.24	14	6.67	1.25	6.63	8.77	4.92		20.2	23.6	16	12.8	9.44	6.51	14	9.23	23.7	11.6	0.661	9.26	14.8	7.26		29.4	26.5	21.3	13.9	20.5	19.1	28.7	11.6	17.8	16.7	3.75	15.6	17.8	27.7
	Bw4+ donors	4.33	7.03	3.4	8.33	6.42	4.24										8.46	11.5	10.6	12.1	10.8	13.1										33.3	19.6	10.2	18.3	16.8	13
Fig 6B	Bw4-BCL 3rd test	Bw4+BCL 3rd test	No targets
	20.5	25.6	6.66
	20.9	20.6	5.16
	35.4	40.5	6.66
	27.8	29.6	7.26
	16.8	19.7	7.62
Fig 6D		Bw4- BCL					Bw4+ BCL
	Bw4- Donors	0.543848	0.698253	0.775296	0.723901		1.00374	1.11985	1.05091	0.841939
	Bw4+ Donors	0.874115	0.877457	0.726179	0.868085		0.711249	0.777027	1.01747	1.18504
Fig 6F		B*51-L82R																		B*51-I80N
	Bw4- Donors	17542	11340	38859	22852	14589	8209	17612	25879	7717	7631	14923	21560	15741	489	5023	391	6685	6432	29909	27480	36978	26739	19091	7462	19651	34565	8442	9578	11271	29615	31682	5263	3611	1493	4491	6891
	Bw4+ Donors	31438	40513	17117	42795	71034	25806	22362	15305	14715	702	441	1501	886						17638	28187	30655	37526	59665	19432	20382	12192	14029	737	1021	4835	3972
