# Supplementary material for: In vitro education of human natural killer cells by KIR3DL1
Source: Life Sci Alliance. 2019 Nov 13;2(6):e201900434. doi: 10.26508/lsa.201900434 (PMC6856763; doi:10.26508/lsa.201900434)
Supplement: Supplementary file 6 [file LSA-2019-00434_SdataF7.xlsx]

## Sheet: Sheet1
Fig 7C		Bw4- beads									Bw4+beads
	Bw4- Donors	51.5	51.8	32.2	36.4	65.1	33.7	30.6	26.2	17.7	64.2	78.7	32.2	42	62.5	34.9	41.2	24.5	30.2
	Bw4+ Donors	41	17	0.531	19.1	15					49.5	16.1	8.4	23.5	22
